# Supplementary material for: PLA2R-IgG4 antibody as a predictive biomarker of treatment effectiveness and prognostic evaluation in patients with idiopathic membranous nephropathy: a retrospective study
Source: PeerJ. 2022 Oct 10;10:e14193. doi: 10.7717/peerj.14193 (PMC9559058; doi:10.7717/peerj.14193)
Supplement: Supplemental Information 1 [file peerj-10-14193-s001.xlsx]

## Sheet: Sheet1
Group（1=RTX,2=CTX）		Sex（1=men，2=male）	Age	Hypertension（1=yes，0=no）	Diabetes (1=yes，0=no)	Tubulointerstitial lesion score	Pathological stages	glomerular PLA2R antigen(1=positive ,0=negtive)	IgG4(0=-.1=+.2=++,3=+++)	IgG3(0=-.1=+.2=++,3=+++)	IgG2(0=-.1=+.2=++,3=+++)	IgG1(0=-.1=+.2=++,3=+++)	ACEI/ARB use (1=yes, 0=no)	Systolic BP, mmHg	Diastolic BP, mmHg	Serum albumin, g/L	Proteinuria, g/L	Serum creatinine, mmol/L	Uric acid, mmol/L	eGFR, mL/min per 1.73 m2	Serum triglycerides, mmol/L	Serum cholesterol, mmol/L	PLA2R-IgG, RU/mL	PLA2R-IgG, RU/mL	log(PLA2R-IgG)	log(PLA2R-IgG4)	6 months	Serum albumin, g/L	Proteinuria, g/L	Serum creatinine, mmol/L	Serum creatinine, mmol/L	PLA2R-IgG, RU/mL	PLA2R-IgG4, RU/mL	∆PLA2R-IgG, RU/mL	∆PLA2R-IgG4, RU/mL	∆PLA2R-IgG/PLA2R-IgG	∆PLA2R-IgG4/PLA2R-IgG4	remission（CR=1,PR=2,NR=3）	remission（1=CR+PR，2=NR）	9 months	Albumin, g/L	24-h urine protein, g/24h	Serum creatinine, mmol/L	eGFR, mL/min per 1.73 m2	remission（CR=1,PR=2,NR=3）	12 months	Albumin, g/L	24-h urine protein, g/24h	Serum creatinine, mmol/L
1	1	1	36	0	0	3	1	1	3	0	0	1	1	104	64	32.3	1.42	89.4	385.2	95.1	1.79	6.17	2.46	5.31	0.390935	0.725095		41.7	0.04	90.5	93.7	0.49	0.59	1.97	4.72	0.800813	0.888889	1	1		44.8	0.1	82	104	1		43.6	0.06	90.2
1	2	1	67	0	0	6	2	1	3	0	0	1	1	115	78	27.2	3.27	189	419.9	31.1	2.12	4.13	12.79	74.66	1.10687	1.87309		29	2.74	169.3	35.3							3	2		33	1.67	172	34.8	2		38.1	1.05	180
1	3	2	43	1	0	2	1	1	3	0	0	1	0	105	82	26.7	4.1	236.7	317	21.2	2.06	6.73	33.67	139.9	1.52724	2.14582		26.2	2.66	247	19.9	112.59	311.72	-78.92	-171.82	-2.34393	-1.22816	3	2		23.6	3.29	174	30.5	3		30.3	3.77	227
1	4	1	62	1	0	3	2	1	3	1	1	1	1	134	87	14.5	2.09	105	300	64.6	2.12	6.74	67	246.8	1.82607	2.39235		23.9	3.05	79.4	91.3	5.59	8.35	61.41	238.45	0.916567	0.966167	3	2		30.4	2.37	77.5	91.6	2		41.3	0.29	84.8
1	5	2	28	0	0	2	1	1	3	0	0	0	1	100	62	22.7	5.01	55.8	226.6	122.4	1.03	6.05	1.49	14.81	0.173186	1.17056		43.2	0.06	59	119.3	0.67	2.27	0.82	12.54	0.550336	0.846725	1	1		40.8	0.11	106.8	67.1	1		47.7	0.04	63
1	6	1	48	1	0	0	1	1	3	0	0	1	1	142	105	18.4	7.22	67.6	481.1	108.4	3.64	11.55	71.49	1140.19	1.85425	3.05698		33.8	4.71	77.2	101.9	1.82	3.22	69.67	1136.97	0.974542	0.997176	2	1		36.8	3.07	79.7	100.6	2		36.7	0.31	68.8
1	7	1	78	1	0	3	2	1	3	0	0	1	0	156	90	18.2	3.71	146	274	38.9	1.4	9.19	914.2	3577.18	2.96104	3.55354		21.1	2	118.7	50.3							3	2		24.9	2.26	127	46	3		33.9	1.5	124.8
1	8	2	57	1	0	3	1	1	3	1	0	1	1	120	80	23.4	3.9	50	410	103	2.38	5.93						27.9	3.42	47.8	105							3	2		35.9	0.46	53.9	101	2		42.3	0.34	58
1	9	1	54	1	0	2	1	1	3	1	0	1	1	140	79	27.3	5.79	119.2	471	59.2	1.32	5.53	13.01	97.53	1.11428	1.98914		42.4	0.68	113.8	62.2	4.67	2.89	8.34	94.64	0.641045	0.970368	2	1		40.8	0.11	106.8	67.1	1		41.8	0.16	111
1	10	1	67	1	0	3	1	1	3	0	0	0	1	150	90	22.7	2.82	87.3	589.5	78.7	1.53	6.85	32.72	264.45	1.51481	2.42234		38.8	0.56	88.7	76.6	2.75	3.86	29.97	260.59	0.915954	0.985404	2	1		40.4	0.1	86.8	78.7	1		41.2	0.15	79
1	11	1	56	1	1	3	1	1	3	0	1	1	1	131	70	25.4	7.12	57.2	283	109	2.1	5.94	5.58	41.63	0.746634	1.61941		29.4	7.56	57.8	107.7	1.82	4.83	3.76	36.8	0.673835	0.883978	3	2		33	4.14	51.7	112.8	3		40.1	0.68	61.6
1	12	1	48	1	0	3	2	1	3	0	0	1	1	139	86	14.7	3.72	90.6	293.1	86	1.97	11.24	220.3	1359.79	2.34301	3.13347		31.3	4.12	84.6	93.4	2.02	2.34	218.28	1357.45	0.990831	0.998279	3	2
1	13	1	31	0	0	3	2	1	3	0	0	1	1	130	90	22.2	4.77	65.8	335	122.6	1.1	4.98	159.26	2203.75	2.20211	3.34316		26	2.09	60.6	126.8	104.82	1089.86	54.44	1113.89	0.341831	0.505452	3	2		33.5	1.18	68.8	119.5	2		33.9	0.62	61.4
1	14	1	74	1	0	6	2	1	3	0	0	1	0	117	87	17	2.62	121.6	303	50.2	2.08	9.16	538.84	1255.77	2.73146	3.09891		22.6	3.29	136.9	43.5							3	2
1	15	2	60	1	0	2	1	1	2	1	0	1	1	122	87	23.5	2.63	48.8	420	102.2	1.77	4.96	231.47	2727.02	2.36449	3.43569
1	16	2	34	0	0	3	1	1	3	0	0	1	1	120	75	24.4	5.67	50.9	272.4	120.9	1.31	8.55	211.87	1247.32	2.32607	3.09598		43.4	0.05	56.8	116.6	1.97	0.71	209.9	1246.61	0.990702	0.999431	1	1		43.9	0.06	58.8	115.3	1		44.7	0.05	61.5
1	17	2	67	1	0	3	2	1	3	0	0	0	1	125	65	21.1	2.79	73.1	366.3	73.5	2.01	8.82	195.78	1609.94	2.29177	3.20681		31.3	2.34	70.4	76.4	89.97	283.56	105.81	1326.38	0.540454	0.823869	3	2		28.8	2.44	68.8	79.5	3		26.8	3.24	74.8
1	18	2	59	1	0	3	2	1	3	0	0	1	0	120	80	21.1	4.3	90.8	389.7	50.8	5.68	7.23	118.23	1465.99	2.07273	3.16613		24.9	2.8	82.2	67.5	12.36	34.41	105.87	1431.58	0.895458	0.976528	3	2		30.3	2.67	80.4	68.8	3		28.5	3.18	73.4
1	19	2	56	1	1	0	1	1	3	1	0	1	1	98	68	18.9	4.82	76.2	480	75.5	2.39	7.08	367.98	2549.79	2.56582	3.4065		25.4	5.62	75.2	76.8	17.97	175.94	350.01	2373.85	0.951166	0.930998	3	2		28.2	5.7	51.3	103.4	3		33.4	3.43	54.3
1	20	1	38	0	0	3	1	1	2	0	0	1	1	120	80	38.2	1.98	92	315.8	90.6	0.93	5.4	3.14	3	0.49693	0.477121		47.1	0.05	86.5	97.6	0.99	0.9	2.15	2.1	0.684713	0.7	1	1		47.7	0.08	88.3	94.5	1		46.4	0.31	82.3
1	21	1	53	1	1	2	2	1	3	0	0	1	1	148	81	39.6	1.8	111.7	440.9	64	1.29	3.54	4.5	10.72	0.653213	1.03019		43.7	1.74	96	77	4.99	1.01	-0.49	9.71	-0.108889	0.905784	2	1		46.7	1.12	104.7	69.7	2		45.9	0.93	100.8
1	22	2	54	1	1	3	2	1	3	0	0	1	1	130	80	23.4	3.75	52.8	289	103	1.9	8.81	3.03	22.7	0.481443	1.35603		29.2	2.08	45.4	108.3	15.59	185.8	-12.56	-163.1	-4.14521	-7.18502	3	2		28.3	3.32	55	100.3	3		31.3	2.59	63.7
1	23	2	34	1	0	3	2	1	3	0	0	2	1	108	80	16.1	5.44	72.5	291.3	93.6	1.76	7.92	518.67	6327.38	2.71489	3.80122		22.1	4.13	80.3	82.2	15.14	82.49	503.53	6244.89	0.97081	0.986963	3	2		35.2	3.78	85.7	76	2		38.5	3.18	80
1	24	1	53	1	0	6	2	1	3	0	0	1	1	125	87	18.9	4.52	94.3	432	79.1	9.76	6.9	239.67	2139.73	2.37961	3.33036		28.8	3.25	115.2	62.1	9.38	35.17	230.29	2104.56	0.960863	0.983563	3	2		28.5	3.76	115.7	61.4	3		30.3	3.57	106.2
1	25	1	56	1	1	3	2	1	3	1	0	1	1	165	92	21.3	5.78	121.5	353.6	57	2.17	5.32	270.34	2939.08	2.43191	3.46821		39.6	1.98	110.5	64							2	1		34.2	2.67	120	57.8	2		33.2	2.29	116.2
1	26	2	70	0	0	3	2	1	3	0	0	1	1	142	90	22.7	3.34	62.3	301.8	87.3	1.34	6.15	152.08	1169.29	2.18207	3.06792		31.4	1.3	64.5	83.2	1.49	3.38	150.59	1165.91	0.990203	0.997109	2	1		37.5	0.94	71.3	73.7	2		42.3	0.18	78
1	27	2	53	0	0	2	1	1	3	0	1	1	1	118	85	26.3	4.32	53.4	267.2	104	2.22	6.85	56.92	328.9	1.75526	2.51706		38	1.79	62.2	97.9	4.21	6.99	52.71	321.91	0.926037	0.978747	2	1		39.6	1.08	61.9	98.5	2		40.5	0.87	67.3
1	28	1	32	0	1	3	2	1	3	0	0	1	1	124	70	23.7	8.07	78.8	418.8	113.1	1.64	6.79	2.41	7.93	0.382017	0.899273		38.3	3.25	91.4	95.2	3.28	4.27	-0.87	3.66	-0.360996	0.461538	2	1		37.3	1.26	3.36	81.4	2		39.9	1.86	73.8
1	29	2	69	0	1	3	1	1	3	0	0	1	1	110	65	18.9	4.02	54.6	376.1	92.3	1.08	6.94	94.31	508.33	1.97456	2.70615		30.9	2.6	60.9	89.2							2	1		33.7	1.68	56	91.6	2		37.2	1.06	56.8
1	30	1	90	0	0	3	1	1	3	1	1	1	0	153	77	33	2.17	119.4	412.4	45.9	1.63	6.95	33.8	89.67	1.52892	1.95265		23	3.33	115.4	59.8	13.27	37.65	20.53	52.02	0.607396	0.580127	3	2		28.6	3.9	122.3	44.6	3		17.4	3.98	138.6
2	1	1	60	1	1	4	1	1	3	0	0	1	1	100	70	20.1	5.04	72.4	380	102	2.84	6.3	86.78	824.34	1.93842	2.91611		31.8	3.02	99.2	70.4	1.94	2.16	84.84	822.18	0.977645	0.99738	2	1		32.8	2	98	72	2		40.1	0.39	110.6
2	2	1	51	1	0	3	1	1	2	0	0	1	1	130	80	22.3	4.545	78.8	295.9	95.6	6.13	8.27	76.01	961.6	1.88087	2.98299		36.5	0.14	84.6	91.5	13.27	1.03	62.74	960.57	0.825418	0.998929	1	1		36.8	0.15	82	94	1		36	0.05	82.3
2	3	2	69	1	0	3	2	1	3	0	0	1	1	130	90	22.4	4.87	47.9	358.3	118.5	2.25	7.18	36.83	379.75	1.5662	2.5795		32.8	3.05	70.2	76.1	7.88	2.36	28.95	377.39	0.786044	0.993785	2	1		32.1	0.82	52.6	93.6	2		35.6	0.18	61
2	4	2	68	1	1	3	3	1	3	0	0	1	1	174	95	23.6	3.8	61.4	286.9	89.24	3.98	6.24	10.48	9.66	1.02036	0.984977		29.8	0.28	53.2	93.9	6.03	0.51	4.45	9.15	0.424618	0.947205	1	1		33.8	0.15	55.8	96	1		35.7	0.03	51.6
2	5	1	29	1	0	3	2	1	3	0	0	1	1	141	90	31.1	5.78	73.7	490	121.4	1.68	7.76	13.61	2.1	1.13386	0.322219		32.4	1.92	75.7	117.4	7.34	0.34	6.27	1.76	0.460691	0.838095	2	1		36	1.4	74.5	120.4	2		42.5	0.34	80.4
2	6	1	39	0	0	2	1	1	3	0	0	0	1	113	83	30.3	4.43	81.8	396.6	96.7	2.37	5.32	10.15	23.36	1.00647	1.36847		44.9	0.08	89.8	92	5.71	0.4	4.44	22.96	0.437438	0.982877	1	1		42.7	0.04	77.9	109.8	1		44.9	0.08	89.8
2	7	2	55	1	0	3	2	1	3	1	0	1	1	151	98	17.4	4.36	57.7	303.3	100.8	2.05	9.2	17.62	119.54	1.24601	2.07751		31	0.12	72.8	76.6	9.24	5.78	8.38	113.76	0.475596	0.951648	1	1		33.7	0.02	67.1	88.1	1		36.7	0.04	72.8
2	8	2	39	0	0	3	2	1	3	0	0	1	1	120	70	22	5.04	58.9	527.4	111.3	0.95	4.98	19.95	26.3	1.29994	1.41996		36.8	0.03	66	100.6	23.47	1.28	-3.52	25.02	-0.176441	0.951331	1	1		36	0.03	65.3	101.9	1		36.8	0.11	61.5
2	9	1	40	0	0	0	3	1	2	0	0	1	1	120	70	20.1	4.07	66	360	115	2.43	7.26	11.88	81.55	1.07482	1.91142		36.5	0.06	75.8	107.8	8.43	3.68	3.45	77.87	0.290404	0.954874	1	1		37.7	0.15	78.5	106.3	1		35.3	0.01	66.6
2	10	2	42	1	0	0	2	1	3	0	1	1	1	140	96	18.1	9.4	72	386.3	93.8	1.7	5.62	63.77	328.09	1.80462	2.51599		33.4	0.52	60.3	107.8	6.05	3	57.72	325.09	0.905128	0.990856	2	1		35.3	0.3	62.4	104.5	1		36	0.29	69.7
2	11	2	70	1	0	3	2	1	3	0	0	1	1	156	78	22.7	5.83	63.4	273.3	85.5	2.99	10.3	52.66	468.87	1.72148	2.67105		33	1.88	80.3	67.9	3.9	6.47	48.76	462.4	0.92594	0.986201	2	1		33	0.25	76.3	67.9	1		41.7	0.09	79.6
2	12	2	39	0	0	2	1	1	3	1	0	1	0	112	62	23.5	6.52	46.9	297.9	119.9	1.68	5.37	9.94	13.75	0.997386	1.1383		34.6	0.14	47.1	118.3	6.4	4.1	3.54	9.65	0.356137	0.701818	1	1		33.1	0.18	47.9	118.3	1		38.3	0.49	46.9
2	13	1	39	1	0	6	2	1	3	0	0	1	1	125	80	30	3.06	98.7	366.4	82.6	6.58	6.4	55.04	582.68	1.74068	2.76543		30.4	2.68	91.4	90.7	3.26	2.94	51.78	579.74	0.94077	0.994954	2	1		33.3	0.66	74.3	109.5	1		38	0.06	81.1
2	14	2	63	1	0	3	1	1	2	0	0	1	1	130	80	17.3	8.45	75.6	428.1	71.3	2.32	7.56	162.18	1119.26	2.21	3.04893		16.4	7.65	170.3	27.2	50	113.03	112.18	1006.23	0.691701	0.899014	3	2		18.9	8.28	118.8	42	3		19	8.56	110.6
2	15	1	47	1	0	3	2	1	3	0	0	1	1	144	88	19.4	7.98	130.3	280	54.4	2.24	9.52	122.43	1453.8	2.08789	3.1625		11.8	8.92	89.4	87.4	15.42	232.57	107.01	1221.23	0.87405	0.840026	3	2		12.4	6.56	93	83.3	3		13	8.19	94.7
2	16	1	60	1	0	3	2	1	3	0	0	1	1	130	75	16.6	9.67	117.1	296	58	1.52	6.53	53.2	283.31	1.72591	2.45226		28.9	2.48	115.7	58.4	8.53	11.56	44.67	271.75	0.839662	0.959197	3	2		25.9	4.7	99.6	70	3		28.9	2.11	122.1
2	17	1	64	0	0	6	2	1	3	0	0	0	1	100	68	12.5	7.68	96.7	433.6	71	5.25	7.43	62.61	398.57	1.79664	2.6005		22.3	5.49	170.6	48.7	66.7	609.88	-4.09	-211.31	-0.065325	-0.53017	3	2		18	8.18	135	42	3		25.9	4.13	218.2
2	18	2	55	1	0	3	2	1	3	0	1	1	1	124	85	28	5.09	63.5	386.5	94.8	3.35	11.22	102.77	484.54	2.01187	2.68533		22.3	5.18	55.6	100.6	89.03	481.5	13.74	3.04	0.133697	0.00627399	3	2		22.5	5.98	58	99.3	3		23.2	5.09	74.6
2	19	1	64	1	1	3	2	1	3	0	0	1	1	159	80	14.5	10.48	112.7	351.5	59	1.57	7.03	169.87	1129.2	2.23012	3.05277		12.7	5.03	225.2	25.6	35.37	176.24	134.5	952.96	0.791782	0.843925	3	2		13.8	4.52	253.4	22	3		15.4	4.3	243
2	20	1	61	1	1	3	2	1	3	0	0	1	1	130	79	16.2	5.02	88	477.2	81.3	1.13	7.49	35.94	194.68	1.55558	2.28932		14.3	7.83	114.4	59.2	40.56	98.63	-4.62	96.05	-0.128548	0.493374	3	2		23.1	4.22	100.6	69.2	3		34	0.65	82.2
2	21	1	44	1	0	6	2	1	3	0	0	1	1	176	116	15.3	6.31	116.4	270	65.3	3.9	13.41	161.07	1480.63	2.20701	3.17045		17	6.9	95.5	83	36.5	451.88	124.57	1028.75	0.77339	0.694806	3	2		21.7	1.55	124.6	59.8	2		22.8	1.28	152.8
2	22	1	47	0	0	3	1	1	3	0	0	1	1	115	81	22.2	9.16	67.4	347	109.3	2.5	9.59	60.3	707.37	1.78032	2.84965		26.5	7.61	59.7	114	31.18	303.57	29.12	403.8	0.482919	0.570847	3	2		20.7	5.11	68.9	107.5	3		20.7	5.11	68.9
2	23	1	55	1	0	3	1	1	2	1	0	1	1	140	98	18.1	6.47	83.5	309	90.1	2.25	9.96	73.08	608.95	1.8638	2.78458		25	4.96	89.3	83.3	14.85	76.46	58.23	532.49	0.796798	0.87444	3	2		24.5	5.05	88	85.8	3		24.5	5.05	88
2	24	2	58	1	0	3	1	1	3	0	0	1	1	135	86	17.8	4.8	61.8	373.1	95.9	2.36	10.27						22.5	5.53	79.2	71.1	663.48						3	2		26.5	3.07	77.5	73.5	3		26.5	3.07	77.5
2	25	2	46	0	0	4	2	1	3	0	1	1	1	143	84	20.3	4.43	53	246.4	109.7	1.82	5.42	6.49		0.812245			26.8	1.94	53.1	109.6	12.41		-5.92		-0.912173		2	1		25.8	2.45	51.8	100.7	3		25.8	2.45	51.8
2	26	1	43	0	0	2	1	1	3	0	0	1	1	142	98	23.7	3.26	83.5	409.1	98.3	4.43	6.74	149.47		2.17455			37.8	0.09	64.3	113	0.83		148.64		0.994447		1	1		42.9	0.11	75.7	106.4	1		45	0.05	78.2
2	27	2	55	1	1	3	1	1	3	0	0	1	0	124	85	28	5.09	63.5	386.5	94.8	3.35	11.22						22.4	4.11	55.6		194.73						3	2		23.2	5.56	74.6	100.8	3		23.2	5.56	74.6
2	28	1	45	1	1	3	1	1	3	0	0	1	1	144	85	14.5	4.522	89	360	78.8	3.28	7.05	26.82		1.42846			40.8	2.84	93.8	83.6	1.8		25.02		0.932886		2	1		40.7	1.46	72.4	103.4	2		43.2	0.66	72.4
2	29	1	65	1	0	6	2	1	3	1	0	1	1	126	60	14.2	9.84	97.3	415	70	7.16	7.78	135		2.13033			15.3	5.89	130.5	48.8	125.61		9.39		0.0695556		3	2		13.8	6.14	99.7	67.5	3		28	5.1	97
2	30	2	65	1	1	3	1	1	3	0	0	1	1	146	82	23.3	5.47	63.4	336.7	88.6	3.07	11.2	143.62		2.15721			33	2.12	82.5	63.5	66.52		77.1		0.536833		3	2		36.8	1	91.7	55.9	2		37.1	1.36	37.1
2	31	1	30	1	0	3	1	1	2	0	0	1	0	149	91	24.5	6.57	79.8	410.4	114.1	3.45	9.35	227		2.35603			31.8	0.94	78.9	114.6	50.75		176.25		0.776432		2	1		35.6	1.11	73.8	117	2		36.1	1.47	77.6
2	32	1	58	1	0	2	1	1	3	0	0	1	1	150	97	20.2	3.99	86.2	436.1	85.2	2.83	8.18	9.28		0.967548			35.2	0.04	79.6	93.1	1.87		7.41		0.798491		1	1		38.5	0.08	77.7	94.1	1		37.5	1.78	76
2	33	2	43	0	0	3	1	1	3	0	0	0	1	98	65	27.4	2.29	60.3	261.3	107.4	1.84	4.97	174.08		2.24075			28.6	2.55	62.1	105	100.82		73.26		0.420841		3	2		29.5	1.38	60.2	106.7	2		29.3	0.82	59.9
2	34	1	33	0	0	3	2	1	3	0	0	1	1	154	105	20	3.62	93.4	407.7	93.7	3.7	9.61	246.02		2.39097			26.5	4.41	80.3	100.8	200.12		45.9		0.18657		3	2		26.6	3.18	79.3	111.2	3		26.6	3.18	79.3
2	35	1	42	0	0	3	1	1	3	1	0	2	1	145	95	14.5	5.17	93.8	404.6	86	10.23	8.91	98.12		1.99176			27.9	3.24	70.3	100.7	1.83		96.29		0.981349		3	2		28.6	1.64	61.7	115.7	2		38.6	0.66	69.4
2	36	1	59	1	0	3	1	1	3	0	1	1	1	120	80	24.6	7.22	73.5	506.9	96.2	2.92	6.21	5.73		0.758155			35.2	0.88	67.1	99.2	2.58		3.15		0.549738		2	1		37.4	0.7	66.3	99	2		37.1	0.57	74.2
2	37	2	31	0	0	1	1	1	3	0	0	1	1	104	74	22.2	4.71	55.3	283	120.2	2.53	5.08	7.71		0.887054			37.3	0.07	54.4	120	2.84		4.87		0.631647		1	1		41.1	0.05	51.9	121	1		41.1	0.05	51.9
2	38	1	48	1	0	6	2	1	2	0	0	1	1	140	80	23.3	5.7	81.9	375.5	97.9	3.12	9.97						34	0.75	92.5	83.9	3.61						2	1		36.3	0.26	80.3	99.5	1		35.9	0.1	85.2
2	39	2	64	1	0	4	2	1	3	0	0	1	1	120	80	20.8	5.09	71	235.1	78.1	2.44	5.34						34.3	1.54	80.7	66.4	2.92						2	1		35.8	0.15	71.4	77	1		36.4	0.08	75
2	40	2	40	0	0	0	1	1	3	0	0	1	1	120	70	29	3.68	48.7	261	117.3	1.18	6.88						30.6	2.38	65	102.1	58.2						3	2		34.3	1.61	66	100.3	2		25.5	3.48	50.9
[truncated: 3 more columns]
